# Supplementary material for: Degradable polyisoprene by radical ring-opening polymerization and application to polymer prodrug nanoparticles
Source: Royal Society of Chemistry journal article supplement (doi:10.1039/d2sc05316k), 2023-01-01
Supplement: d2sc05316k1.pdf [file d2sc05316k1.pdf]

## Supplementary Information

# Degradable Polyisoprene by Radical Ring-Opening Polymerization and Application to Polymer Prodrug Nanoparticles

*Maëlle Lages,<sup>1</sup> Théo Pesenti,<sup>1</sup> Chen Zhu,<sup>1</sup> Dao Le,<sup>1</sup> Julie Mouglin,<sup>1</sup> Yohann  
Guillaneuf<sup>2</sup> and Julien Nicolas<sup>1,\*</sup>*

<sup>1</sup> Université Paris-Saclay, CNRS, Institut Galien Paris-Saclay, 17 avenue des  
Sciences, 91400 Orsay, France

<sup>2</sup> Aix-Marseille-Univ., CNRS, Institut de Chimie Radicalaire, UMR 7273, F-13397  
Marseille, France

\*To whom correspondence should be addressed.

Email: [julien.nicolas@universite-paris-saclay.fr](mailto:julien.nicolas@universite-paris-saclay.fr)

Tel.: +33 1 80 00 60 81

**Table S1.** Values of  $f_{\text{DOT},0\text{th}}$ ,  $F_{\text{DOT}}$ , DOT and isoprene conversion used to determine reactivity ratios.

| $f_{\text{DOT},0\text{th}}$ | $F_{\text{DOT}}$ | Conv. DOT | Conv. I |
|-----------------------------|------------------|-----------|---------|
| 0.1                         | 0.29             | 14        | 4       |
| 0.2                         | 0.51             | 23        | 20      |
| 0.3                         | 0.65             | 23        | 12      |
| 0.4                         | 0.83             | 5         | 13      |
| 0.5                         | 0.86             | 12        | 14      |
| 0.6                         | 0.88             | 11        | 34      |
| 0.7                         | 0.9              | 17        | 17      |
| 0.9                         | 0.94             | 3         | 3       |

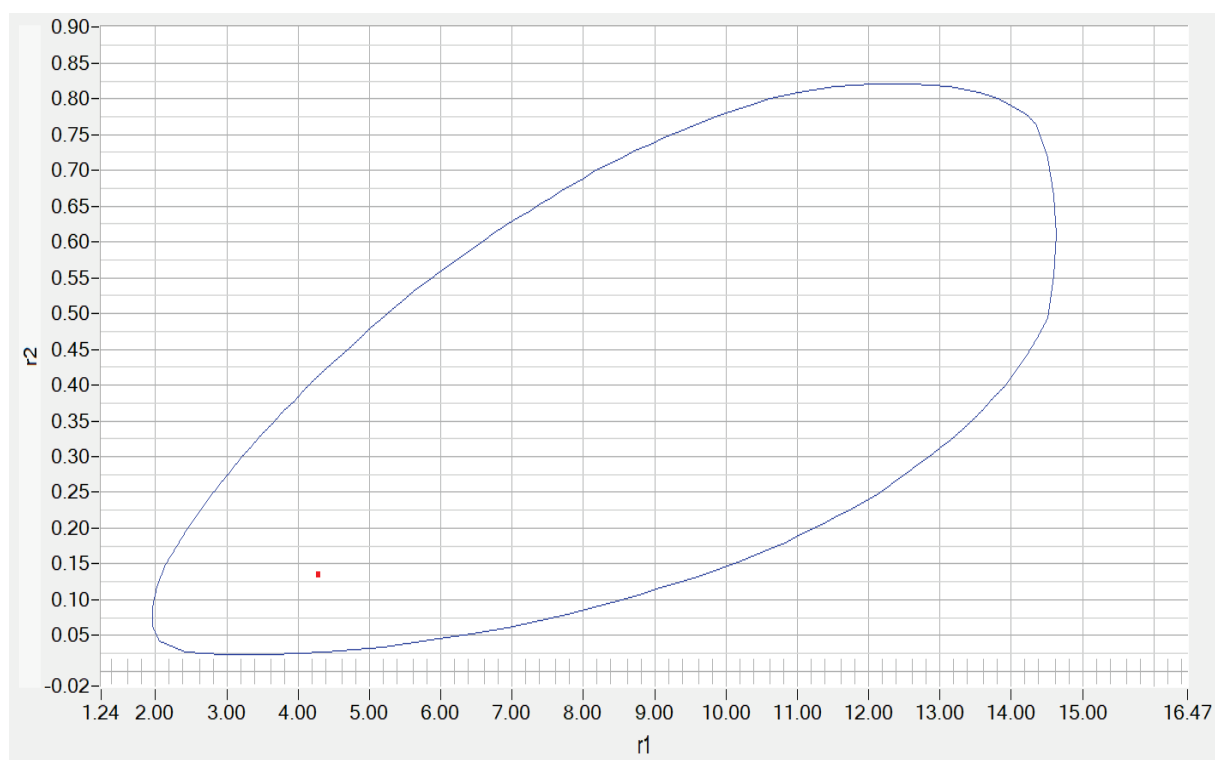

**Figure S1.** 95% joint confidence region (blue trace) for reactivity ratios (red dot) of DOT ( $r_1$ ) and isoprene ( $r_2$ ) determined by the CONTOUR software.

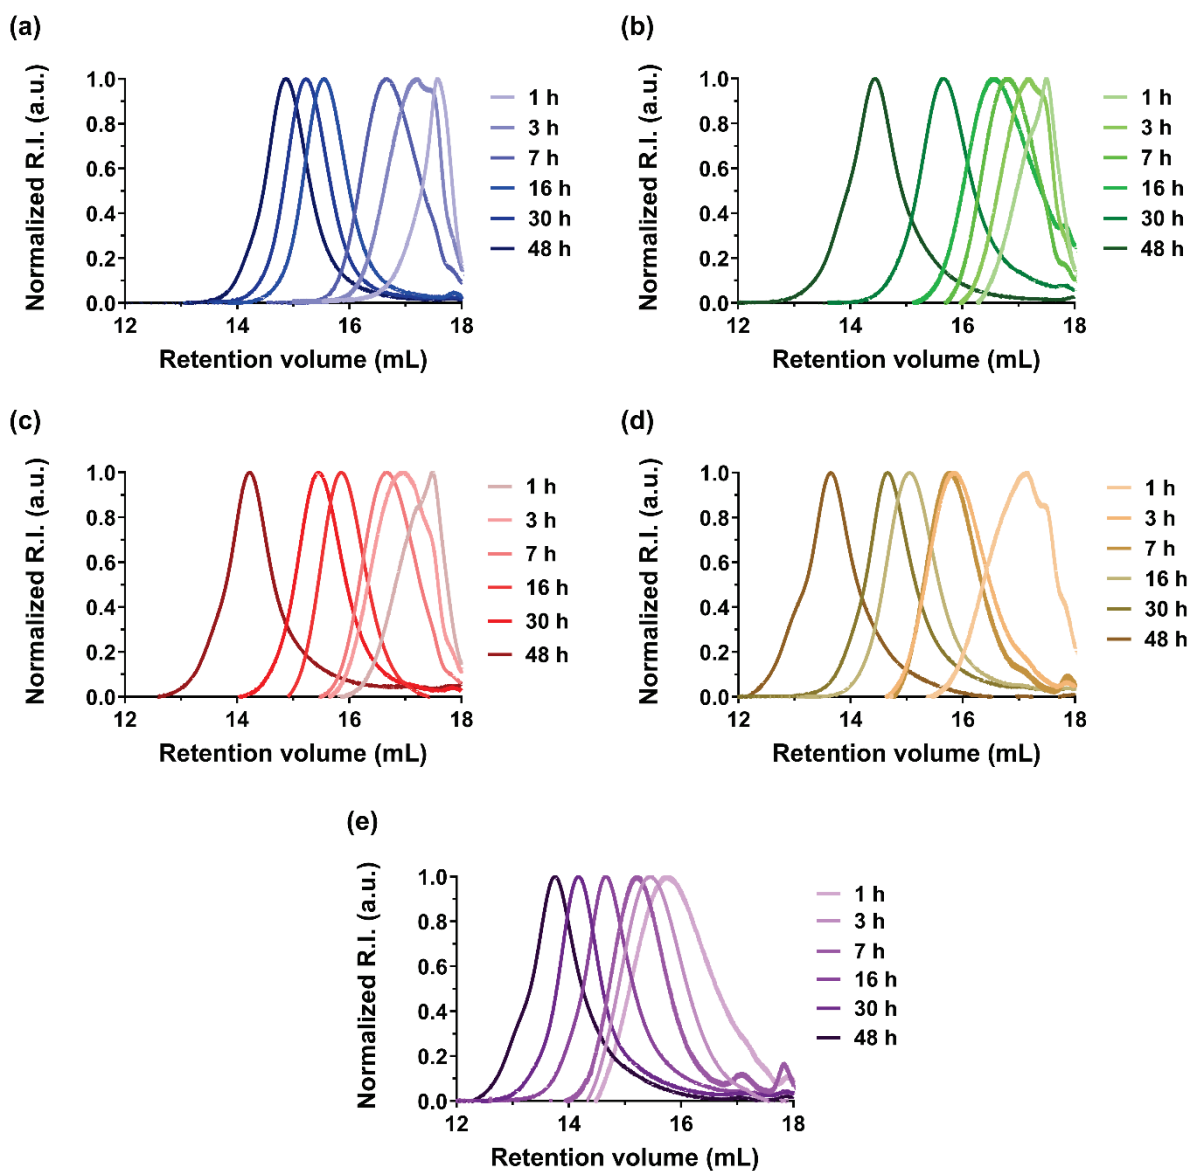

**Figure S2.** Evolution of the SEC chromatograms vs time during the synthesis of P(I-co-DOT) copolymers by nitroxide-mediated polymerization: (a) **N0** experiment ( $f_{\text{DOT},0} = 0 \text{ mol.}\%$   $DP_{n,\text{th}} = 100$ ); (b) **N1** ( $f_{\text{DOT},0} = 1 \text{ mol.}\%$   $DP_{n,\text{th}} = 100$ ); (c) **N2** ( $f_{\text{DOT},0} = 2 \text{ mol.}\%$   $DP_{n,\text{th}} = 100$ ); (d) **N3** ( $f_{\text{DOT},0} = 2 \text{ mol.}\%$   $DP_{n,\text{th}} = 215$ ) and (e) **N4** ( $f_{\text{DOT},0} = 2 \text{ mol.}\%$   $DP_{n,\text{th}} = 435$ ) (see Table 1).

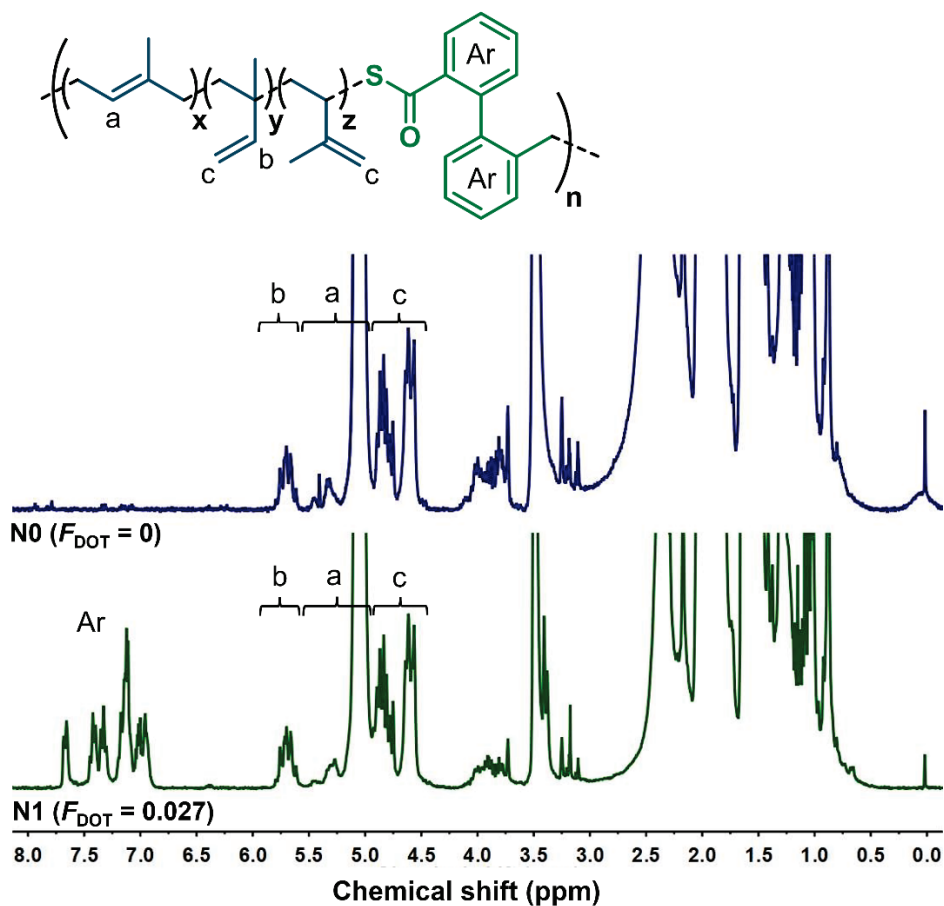

**Figure S3.**  $^1\text{H}$  NMR spectrum (300 MHz,  $d_8$ -THF) in the 0–8 ppm region of P(I-co-DOT) copolymers **N0** and **N1** (see Table 1).

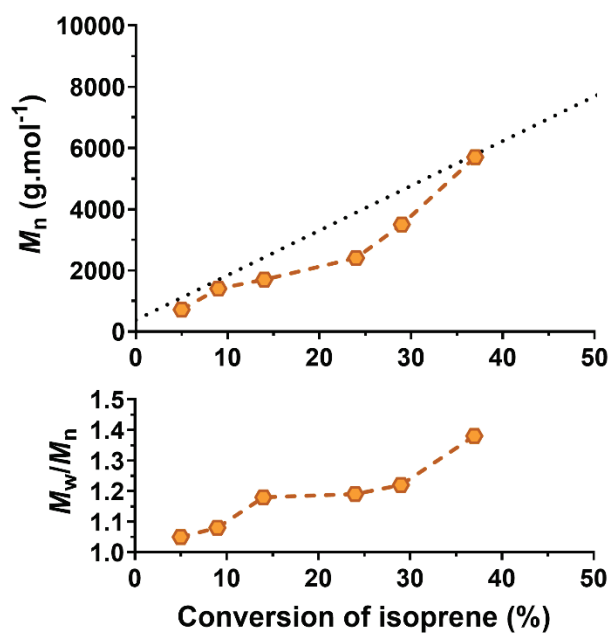

**Figure S4.** Evolution of  $M_n$  and  $\mathcal{D}$  vs. I conversion for **N3'**.

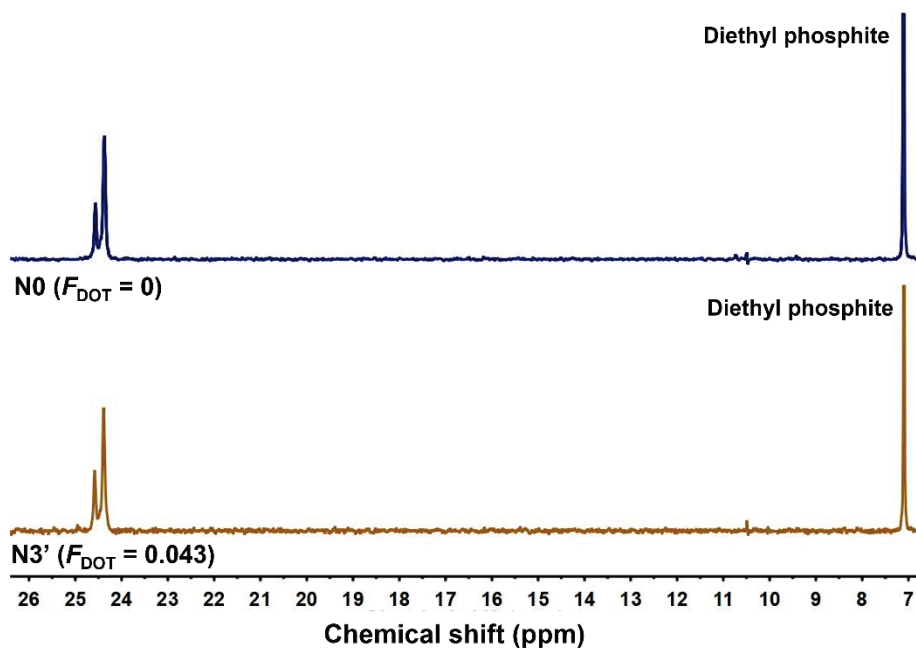

**Figure S5.**  $^{31}\text{P}$  NMR spectrum (400 MHz,  $\text{CDCl}_3$ ) in the 7–26 ppm region of purified PI and P(I-co-DOT) copolymers **N0** and **N3'**, respectively (see Table 1), in the presence of diethyl phosphite.

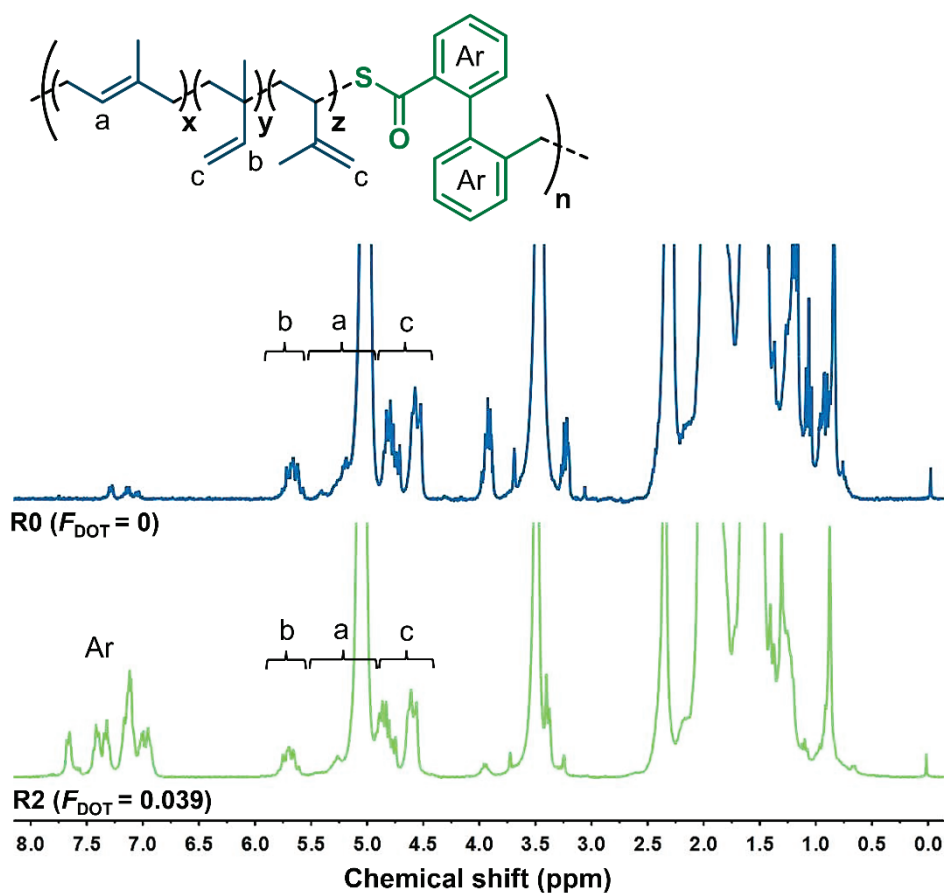

**Figure S6.**  $^1\text{H}$  NMR spectrum (300 MHz,  $d_8$ -THF) in the 0–8 ppm region of P(I-co-DOT) copolymers **R0** and **R2** (see Table 1).

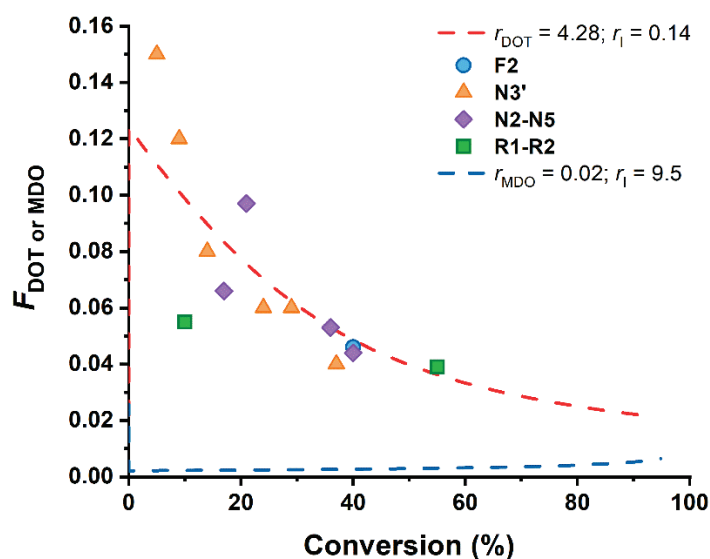

**Figure S7.** Evolution of  $F_{\text{DOT}}$  vs. conversion (dashed red line) and  $F_{\text{MDO}}$  vs. conversion (dashed blue line) plotted using the estimated reactivity ratios ( $r_{\text{DOT}} = 4.29$  and  $r_1 = 0.14$ ;  $r_{\text{MDO}} = 0.02$  and  $r_1 = 9.5$ )<sup>1</sup> and a PREDICI numerical simulation for predicting the compositional drift occurring during the copolymerization between vinyl and cyclic monomers.<sup>2</sup> The experimental points are the values of  $F_{\text{DOT}}$  vs. conversion of **F2**, **N2–N5**, **N3'** and **R1–R2** (Table 1).

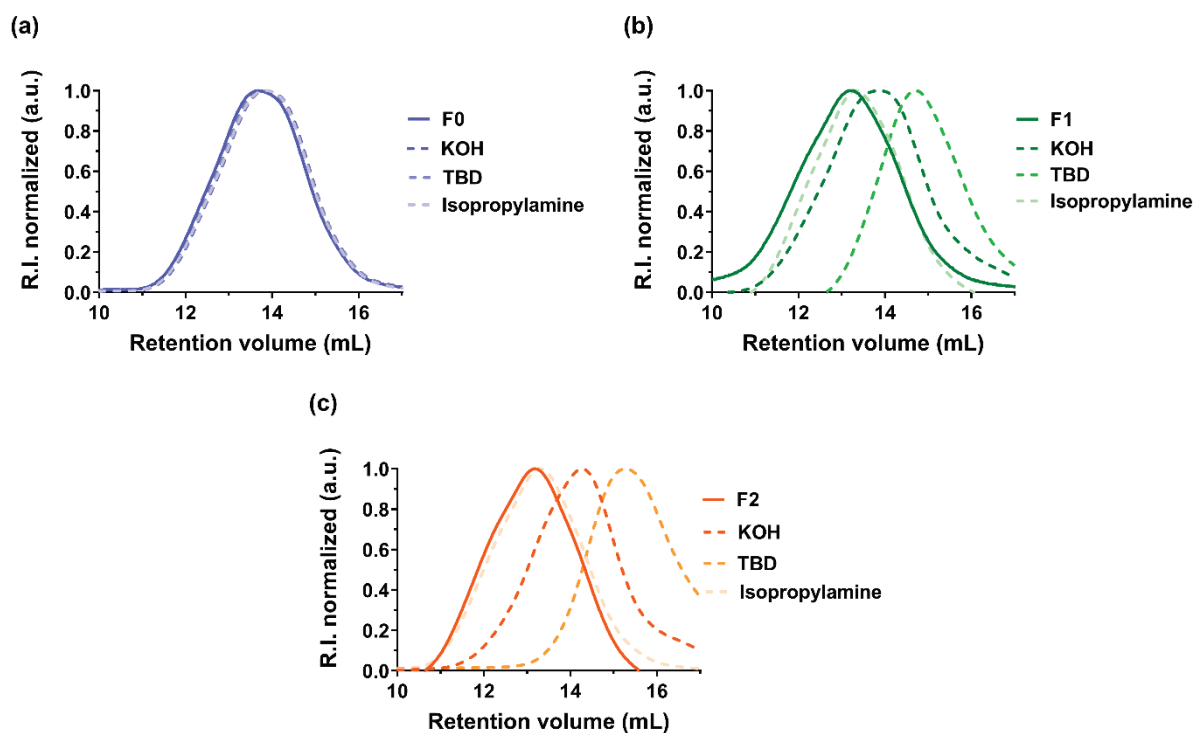

**Figure S8.** Evolution of SEC chromatograms of P(I-co-DOT) copolymers: (a) **F0** ( $f_{\text{DOT},0} = 0$  mol.%), (b) **F1** ( $f_{\text{DOT},0} = 1$  mol.%), (c) **F2** ( $f_{\text{DOT},0} = 2$  mol.%) after degradation under basic or aminolytic conditions.

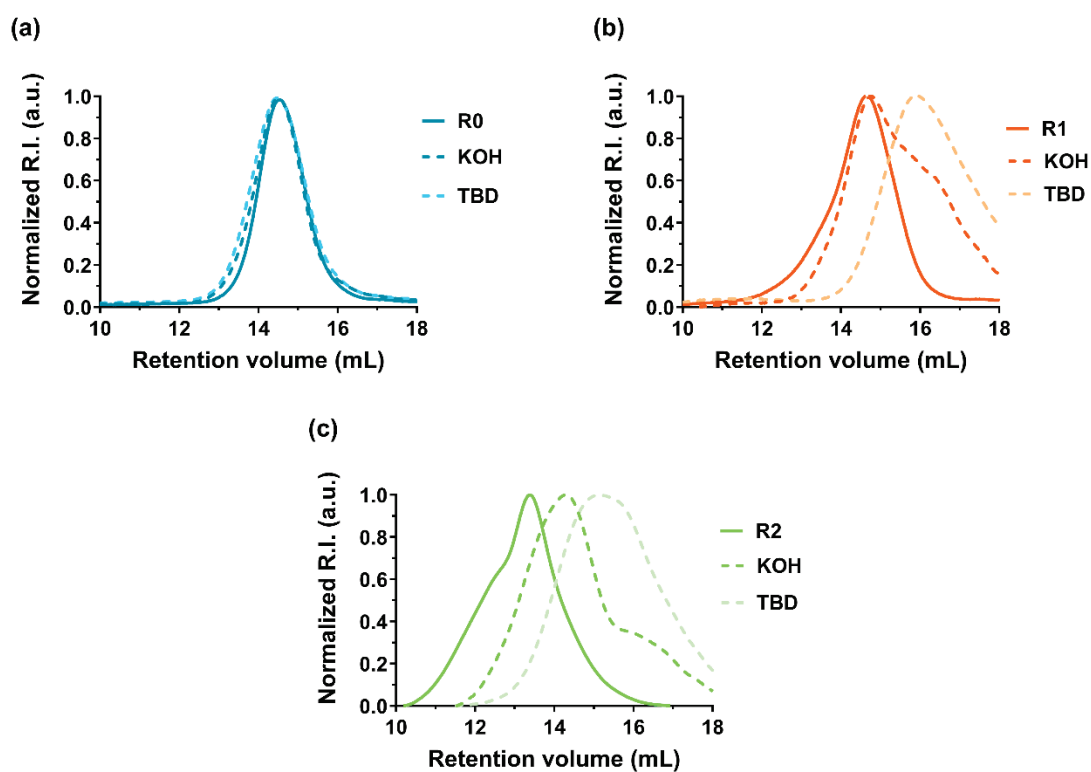

**Figure S9.** Evolution of the SEC chromatograms of P(I-co-DOT) copolymers: (a) **R0** ( $f_{\text{DOT},0} = 0$  mol.%,  $DP_{n,\text{th}} = 500$ , 24 h); (b) **R1** ( $f_{\text{DOT},0} = 2$  mol.%,  $DP_{n,\text{th}} = 500$ , 24 h) and (c) **R2** ( $f_{\text{DOT},0} = 2$  mol.%,  $DP_{n,\text{th}} = 600$ , 72 h) after degradation under basic or aminolytic conditions.

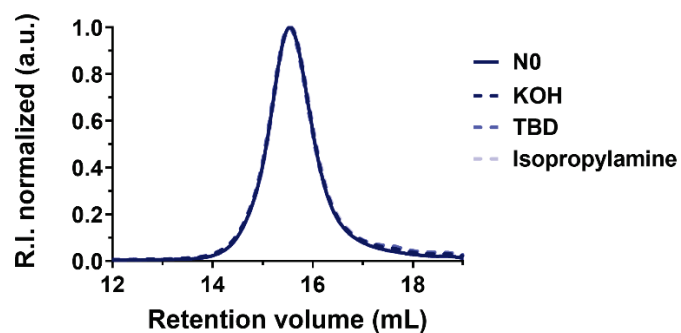

**Figure S10.** Evolution of the SEC chromatograms of PI (**N0**, see Table 1) after degradation under basic or aminolytic conditions.

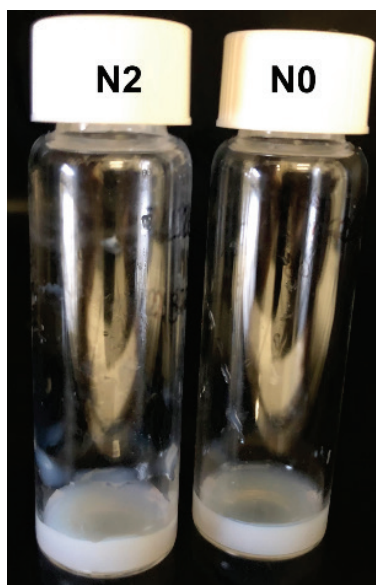

**Figure S11.** Picture of PI and P(I-co-DOT) nanoparticles obtained by nanoprecipitation from **N0** and **N2**, respectively (see Table 2).

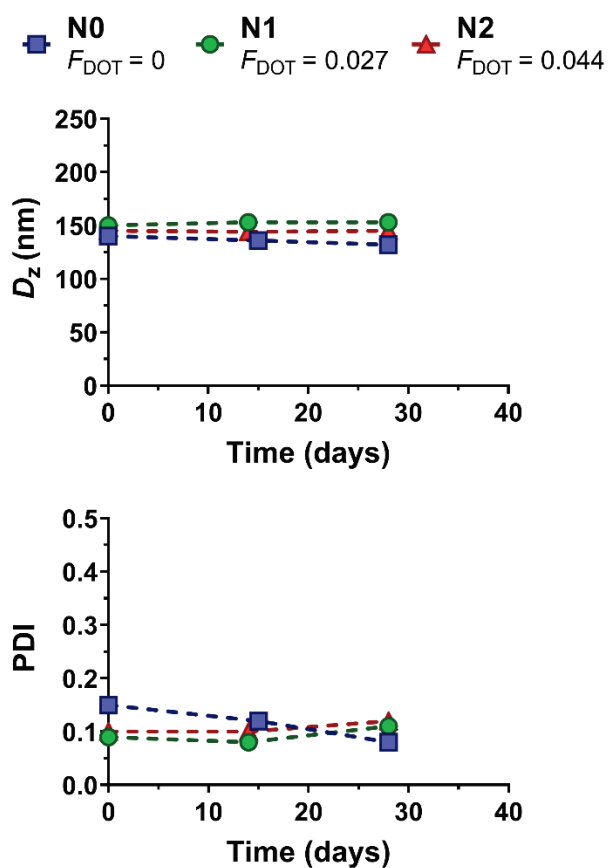

**Figure S12.** Evolution of the intensity-average diameter ( $D_z$ ) and polydispersity index (PDI) with time measured by DLS of PI and P(I-co-DOT) nanoparticles (**N0**, **N1** and **N2**, see Table 3) as function of  $F_{DOT}$ .



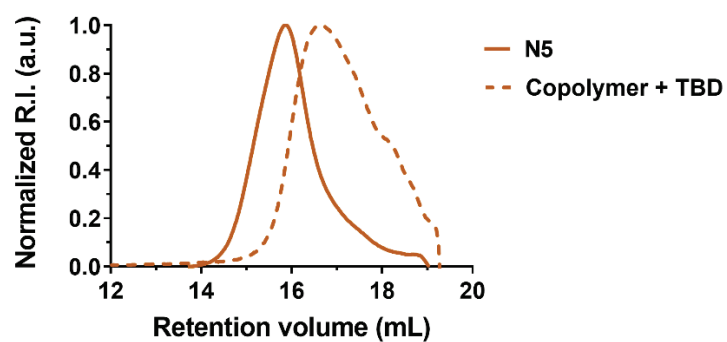

**Figure S13.** Evolution of the SEC chromatograms of Gem-P(I-co-DOT) polymer prodrug (**N5**, see Table 2) after degradation with TBD.

## References

1. A. Tardy, N. Gil, C. M. Plummer, C. Zhu, S. Harrisson, D. Siri, J. Nicolas, D. Gimes, Y. Guillaneuf and C. Lefay, *Polym. Chem.*, 2020, **11**, 7159-7169.
2. D. Gimes, P. H. M. Van Steenberge, D. Siri, D. R. D'hooge, Y. Guillaneuf and C. Lefay, *Macromol. Rapid Commun.*, 2018, **39**, 1800193.
